# Supplementary material for: Understanding and Recognition of the Right Ventricular Function and Dysfunction: A Numerical Study
Source: Research Square preprint supplement (doi:10.21203/rs.3.rs-108022/v1), 2020-11-24
Supplement: Supplementary file 1 [file 4bc62b5450a18dc87ce236dc.pdf]

576 **Understanding and recognition of the right ventricular function and dysfunction: A numerical study**  
577 Giulia Comunale<sup>1\*</sup>, Paolo Peruzzo<sup>1</sup>, Biagio Castaldi<sup>2</sup>, Renato Razzolini<sup>3</sup>, Giovanni Di Salvo<sup>2</sup>, Massimo A.  
578 Padalino<sup>4</sup>, Francesca M. Susin<sup>1</sup>.  
579 <sup>1</sup> Cardiovascular Fluid Dynamics Laboratory HER, Department of Civil, Environmental and Architectural  
580 Engineering – University of Padova, Italy.  
581 <sup>2</sup> Department of Women's and Children's Health, University of Padova Medical School, Italy.  
582 <sup>3</sup> Cardiology Unit, Department of Cardiac, Thoracic and Vascular Sciences and Public Health, University of  
583 Padova Medical School, Italy.  
584 <sup>4</sup> Paediatric and Congenital Cardiovascular Surgery Unit, Department of Cardio-thoracic and Vascular  
585 Sciences and Public Health, University of Padova Medical School, Italy.

586  
587  
588 *Supplementary Information*  
589  
590  
591  
592  
593  
594

## 595    **METHODS**

### 596    *Hemodynamic model*

597    To simulate the blood circulation, we used the lumped parameters methodology. It allows to represent the  
598    vascular compartments of the body, i.e., any vascular segment that it is necessary to describe, by pressure and  
599    flow rate, and the heart. This methodology is widely used to simulate the whole cardiovascular system since  
600    the Windkessel model proposed by Otto Frank in 1899 which approximates the hemodynamics of the systemic  
601    circulation<sup>11–13</sup>. Pressures and flows are obtained by computing the Navier-Stokes and mass conservation  
602    equations averaged over the domain<sup>14</sup>. The vascular compartments are described by lumped parameters able  
603    to represent the geometrical and physical features. Resistances ( $R$ ) represent the resistance to flow due to blood  
604    viscosity, compliances ( $C$ ) reproduce the elastic properties of the vessels, and the inductances ( $L$ ) reflect the  
605    flow inertia. By the combination of these parameters, any section of the vascular system can be considered.  
606    Particularly, supplementary Fig. S1 represents an example of a compartment, described by

$$607 \quad \begin{cases} C \frac{dP_j}{dt} = Q_j - Q_{j+1} \\ L \frac{dQ_{j+1}}{dt} = P_j - P_{j+1} - RQ_{j+1} \end{cases} \quad (S1)$$

608    where  $(P_j, Q_j)$  and  $(P_{j+1}, Q_{j+1})$  are the upstream and downstream pressures and flow rates, respectively. In  
609    this work, the great vessels were reproduced considering the compliance and resistance effects, and the  
610    vascular bed was represented by the resistance effect (supplementary Fig. S2). This holds for both the systemic  
611    and pulmonary circulations. This choice allows to reproduce the elastic properties and small dissipative effects  
612    of the arteries and veins, and the dissipation effects that characterize the small vessels of the vascular bed.  
613    Finally, the heart valves were represented as an ideal diode associated to a resistance. They open and close  
614    instantaneously and they allow the blood to flow through only when there is a positive pressure gradient across  
615    them, forcing a unidirectional flow. The equation is

$$616 \quad Q = \begin{cases} \frac{P_j - P_{j+1}}{R}, & \text{if } P_j - P_{j+1} \geq 0 \\ 0, & \text{otherwise.} \end{cases} \quad (S2)$$

617    with  $P_j$  and  $P_{j+1}$  the pressure upstream and downstream, respectively,  $R$  the valve resistance and  $Q$  the flow  
618    rate.

619    Note that, the present model does not account for chamber interaction via speta<sup>59–61</sup>.

## 620 *Time-varying elastance*

621 To simulate the right ventricular dysfunction, the right time-varying elastances were modified. Supplementary  
622 Fig. S3 shows the right time-varying elastance for the systolic, diastolic, and combined dysfunctions, resulted  
623 from the change of the parameters of Eq. (1), as described in Section Dysfunctional case. In the systolic  
624 dysfunction (Fig. S3a),  $E_{max_{RV}}$ , the maximum contraction force, decreases linearly with  $p$  increasing, from  
625 0.45 mmHg/mL in the healthy condition to the minimum value of  $E_{min_{RV}}$  for the complete impairment  
626 ( $E_{min_{RV}} = 0.035$  mmHg/mL). At the same time, the ejection time increases as well as the acceleration time,  
627 resulting in a delayed of the peak as the pathology worsens. On the contrary, in the diastolic dysfunction (Fig.  
628 S3b),  $E_{max_{RV}}$  is rather constant and the systolic phase slightly varies with  $p$ , ranging between the 37% and the  
629 40% of the heartbeat. However, an increase of ventricular stiffness and the decrease of the deceleration times  
630 are due to larger value of  $E_{min_{RV}}$  and  $m_{2_{RV}}$ , respectively. Finally, in the combined dysfunction (Fig. S3c) the  
631 combination of the previous effects is visible.

## 632 *Sensitivity analysis*

633 A sensitivity analysis as in Mynard<sup>18</sup> was conducted to evaluate the sensitivity of the model. Input parameters  
634 were increased by 25%, one at a time, assessing the changes in the outputs. The sensitivity was computed  
635 considering the mean value of the outputs over one heartbeat as

$$636 \quad S = \frac{\text{mean}(Y_1) - \text{mean}(Y)}{\text{mean}(Y)} \left( \frac{X}{X_1 - X} \right) \quad (S6)$$

637 where  $X$  and  $X_1$  are the input at baseline and 25% increased value, respectively, and  $Y$  and  $Y_1$  are the outputs  
638 with baseline and 25% increased inputs, respectively. Note that a positive value of  $S$  indicates that an increase  
639 in  $X$  determines an increase in  $Y$ , whereas, a negative value of  $S$  shows that an increase in  $X$  causes a decrease  
640 in  $Y$ <sup>18</sup>. Particularly, we evaluated 16 inputs and 20 outputs of the model. Table S2 reports the results. The  
641 inputs are ordered considering the global influence, i.e., as the sum of  $|S|$  for all the outputs analyzed, showing  
642 the most influential on the left. The outputs are ordered based on the overall sensitivity, computed as the  
643 median value of  $|S|$  for all the inputs, with the most sensitive at the top. Supplementary Fig. S4 shows the  
644 outputs listed on the horizontal axis and inputs listed on the vertical axis. Note that in the figure, the outputs  
645 are ordered with the most sensitive on the left, and the inputs are ordered with the most influential at the  
646 bottom. The most influential parameters are those related to the heart chamber contractility. These parameters

are known from the physiology to affect pressures and flows, however, interestingly, the contractility of LV is less influential than that of the other heart chambers. This may be due to the extended research attention posed on LV compared to the other heart chambers, suggesting that the left ventricular parameters are better estimated. Thus, the higher sensitivity of RA, RV, and LA parameters suggests that more attention needs to be posed when calibrating these heart chambers to derive pertinent values and be able to simulate real cases. The most sensitive outputs are those related to the systemic arterial side and the volumes, that are directly linked to the heart chamber contractility. Moreover, only few output variables are sensitive to the variation of inputs, and this is clearly visible from Supplementary Fig. S4 that shows a cluster of larger data points in the left side. The least sensitive outputs signals are the right ventricular and pulmonary venous pressures, and this could be related to the reservoir functionality of the high-compliance pulmonary circulation.

## FIGURES

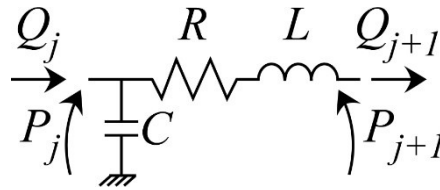

**Fig. S1.** Example of lumped parameter compartment.  $R$ , resistance,  $C$ , compliance,  $L$ , inductance,  $(P_j, Q_j)$  and  $(P_{j+1}, Q_{j+1})$  the upstream and downstream pressures and flow rates, respectively.

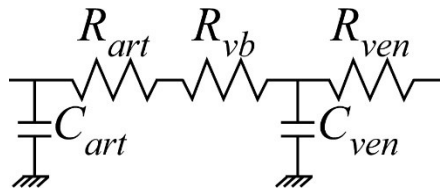

**Fig. S2.** Lumped parameter compartment used in the present work to represent the systemic and pulmonary circulations. The arterial and venous sides are composed by a resistance and a compliance  $(R_{art}, C_{art})$  and  $(R_{ven}, C_{ven})$ , respectively, whereas the vascular bed is represented by a resistance  $(R_{vb})$ .

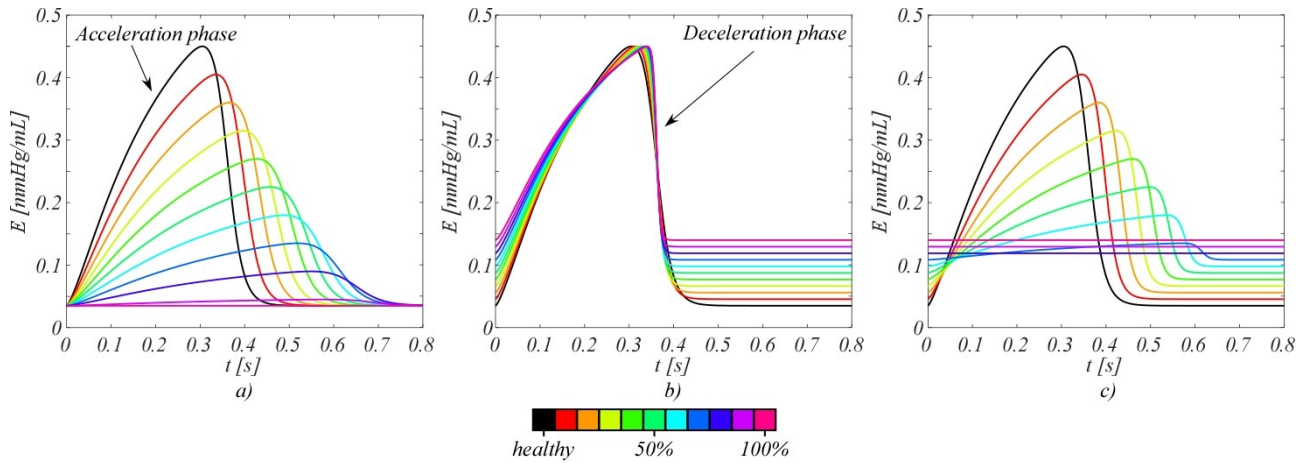

669

670 **Fig. S3.** Right ventricular activation function. *a)* systolic dysfunction, *b)* diastolic dysfunction, and *c)*  
 671 combined systolic and diastolic dysfunction. Black line: healthy RV ( $p=0\%$ ); coloured lines: RV systolic  
 672 impairment,  $p$ , from 10% to 100%.

673

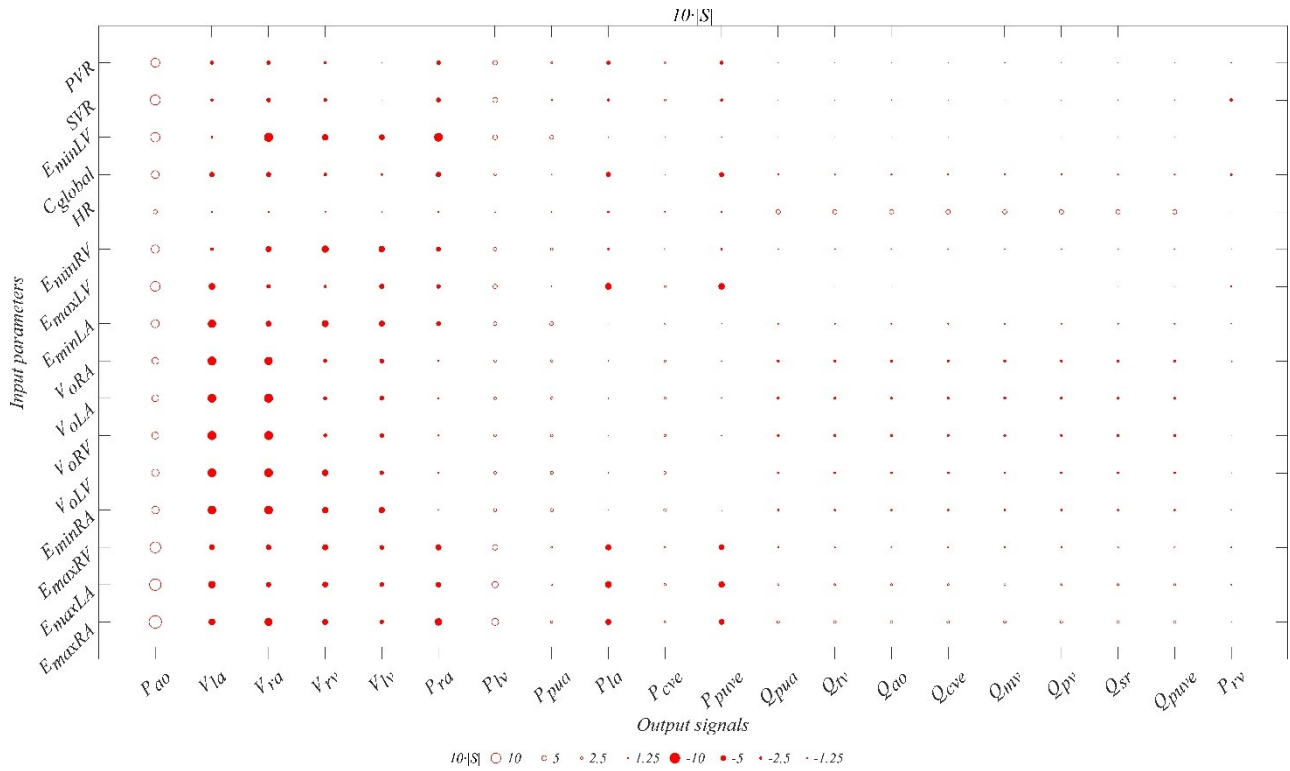

674

675 **Fig. S4.** Graphical representation of the sensitivity of the outputs to the 25% variation of the inputs. A larger  
 676 symbol corresponds with higher sensitivity and filled/empty circles correspond to negative/positive  $S$ . Outputs  
 677 are ordered according to the overall sensitivity (the most sensitive on the left) and inputs are ordered based on  
 678 the global influence (the most influential at the bottom).

679

680    **TABLES**

681    **Table S1.** Heart parameters values.

|                           | LV       | RV       | LA       | RA       |
|---------------------------|----------|----------|----------|----------|
| $E_{max}$ [mmHg/mL]       | 2.8      | 0.45     | 0.13     | 0.09     |
| $E_{min}$ [mmHg/mL]       | 0.07     | 0.035    | 0.09     | 0.045    |
| $V_{p=0}$ [mL]            | 20       | 30       | 3        | 7        |
| $\tau_1$ [s]              | $0.269T$ | $0.269T$ | $0.110T$ | $0.110T$ |
| $\tau_2$ [s]              | $0.452T$ | $0.452T$ | $0.180T$ | $0.180T$ |
| $m_1$ [–]                 | 1.32     | 1.32     | 1.99     | 1.99     |
| $m_2$ [–]                 | 21.9     | 21.9     | 11.2     | 11.2     |
| $t_{onset}$ [s]           | 0        | 0        | $0.85T$  | $0.85T$  |
| $R_{valve}$ [mmHg · s/mL] | 0.01     | 0.01     | 0.005    | 0.005    |

682     $T$  is the heart period.

683

684

685

686

687

688

689 **Table S2.** Mean sensitivity ( $S$ ) of output signals to the input parameters. The inputs are ordered based on the global influence (the most influential on the left), the  
690 outputs are ordered based on the overall sensitivity (the most sensitive at the top).

| Output signals | Input parameters |                 |                 |                 |              |              |              |              |                 |                 |                 |        |         |                 |        |        |
|----------------|------------------|-----------------|-----------------|-----------------|--------------|--------------|--------------|--------------|-----------------|-----------------|-----------------|--------|---------|-----------------|--------|--------|
|                | $E_{\max_{RA}}$  | $E_{\max_{LA}}$ | $E_{\max_{RV}}$ | $E_{\min_{RA}}$ | $V_{0_{LV}}$ | $V_{0_{RV}}$ | $V_{0_{LA}}$ | $V_{0_{RA}}$ | $E_{\min_{LA}}$ | $E_{\max_{LV}}$ | $E_{\min_{RV}}$ | HR     | Cglobal | $E_{\min_{LV}}$ | SVR    | PVR    |
| $P_{ao}$       | 1.251            | 1.154           | 1.077           | 0.750           | 0.724        | 0.685        | 0.681        | 0.672        | 0.798           | 0.963           | 0.817           | 0.408  | 0.778   | 0.939           | 0.995  | 0.892  |
| $V_{la}$       | -0.615           | -0.679          | -0.517          | -0.796          | -0.813       | -0.838       | -0.809       | -0.815       | -0.758          | -0.600          | -0.280          | -0.170 | -0.448  | -0.180          | -0.234 | -0.327 |
| $V_{ra}$       | -0.737           | -0.458          | -0.493          | -0.795          | -0.811       | -0.835       | -0.837       | -0.762       | -0.521          | -0.360          | -0.532          | -0.113 | -0.447  | -0.850          | -0.389 | -0.366 |
| $V_{rv}$       | -0.535           | -0.521          | -0.536          | -0.575          | -0.588       | -0.324       | -0.326       | -0.331       | -0.632          | -0.254          | -0.656          | -0.120 | -0.297  | -0.569          | -0.308 | -0.228 |
| $V_{lv}$       | -0.355           | -0.410          | -0.409          | -0.564          | -0.382       | -0.404       | -0.406       | -0.411       | -0.533          | -0.475          | -0.583          | -0.068 | -0.179  | -0.512          | 0.016  | -0.061 |
| $P_{ra}$       | -0.674           | -0.494          | -0.532          | -0.079          | -0.101       | -0.133       | -0.136       | -0.144       | -0.415          | -0.384          | -0.428          | -0.117 | -0.479  | -0.801          | -0.417 | -0.390 |
| $P_{lv}$       | 0.692            | 0.604           | 0.541           | 0.315           | 0.291        | 0.256        | 0.252        | 0.244        | 0.360           | 0.438           | 0.367           | 0.187  | 0.239   | 0.481           | 0.521  | 0.425  |
| $P_{pua}$      | 0.240            | 0.156           | 0.169           | 0.313           | 0.289        | 0.254        | 0.251        | 0.242        | 0.368           | 0.067           | 0.256           | 0.079  | 0.080   | 0.378           | -0.121 | 0.200  |
| $P_{la}$       | -0.545           | -0.613          | -0.532          | -0.026          | -0.048       | -0.081       | -0.084       | -0.091       | 0.022           | -0.618          | -0.185          | -0.174 | -0.460  | -0.079          | -0.240 | -0.336 |
| $P_{cve}$      | 0.153            | 0.214           | 0.159           | 0.277           | 0.254        | 0.219        | 0.215        | 0.207        | 0.106           | 0.194           | 0.107           | 0.109  | 0.061   | -0.053          | 0.190  | 0.161  |
| $P_{puve}$     | -0.505           | -0.574          | -0.497          | -0.009          | -0.031       | -0.064       | -0.067       | -0.075       | 0.040           | -0.584          | -0.163          | -0.161 | -0.433  | -0.056          | -0.234 | -0.309 |
| $Q_{pua}$      | 0.266            | 0.180           | 0.116           | -0.172          | -0.192       | -0.224       | -0.227       | -0.234       | -0.121          | 0.016           | -0.104          | 0.431  | -0.135  | 0.011           | 0.045  | -0.042 |
| $Q_{tv}$       | 0.265            | 0.180           | 0.116           | -0.171          | -0.192       | -0.224       | -0.227       | -0.234       | -0.122          | 0.016           | -0.105          | 0.430  | -0.135  | 0.009           | 0.043  | -0.043 |
| $Q_{ao}$       | 0.267            | 0.180           | 0.117           | -0.171          | -0.192       | -0.223       | -0.226       | -0.234       | -0.120          | 0.017           | -0.104          | 0.431  | -0.134  | 0.011           | 0.045  | -0.042 |
| $Q_{cve}$      | 0.267            | 0.180           | 0.117           | -0.171          | -0.192       | -0.223       | -0.227       | -0.234       | -0.120          | 0.017           | -0.103          | 0.431  | -0.134  | 0.011           | 0.045  | -0.042 |
| $Q_{mv}$       | 0.266            | 0.180           | 0.116           | -0.170          | -0.191       | -0.223       | -0.226       | -0.233       | -0.120          | 0.016           | -0.103          | 0.430  | -0.135  | 0.011           | 0.044  | -0.043 |
| $Q_{pv}$       | 0.267            | 0.181           | 0.117           | -0.171          | -0.192       | -0.223       | -0.226       | -0.234       | -0.120          | 0.017           | -0.103          | 0.431  | -0.134  | 0.011           | 0.045  | -0.042 |
| $Q_{sr}$       | 0.266            | 0.180           | 0.117           | -0.171          | -0.192       | -0.224       | -0.227       | -0.234       | -0.120          | 0.016           | -0.104          | 0.431  | -0.134  | 0.011           | 0.045  | -0.042 |
| $Q_{puve}$     | 0.267            | 0.181           | 0.118           | -0.170          | -0.191       | -0.223       | -0.226       | -0.233       | -0.119          | 0.017           | -0.103          | 0.431  | -0.133  | 0.012           | 0.045  | -0.041 |
| $P_{rv}$       | -0.024           | -0.080          | -0.092          | 0.065           | 0.042        | 0.009        | 0.006        | -0.002       | 0.075           | -0.159          | 0.011           | -0.024 | -0.195  | -0.007          | -0.268 | -0.089 |

691  $P_{ao}$ , aortic (arterial vessel) pressure,  $V_{la}$ , LA volume,  $V_{ra}$ , RA volume,  $V_{rv}$ , RV volume,  $V_{lv}$ , LV volume,  $P_{ra}$ , RA pressure,  $P_{lv}$ , LV pressure,  $P_{pua}$ , PuA pressure,  $P_{la}$ , LA pressure,  $P_{cve}$ , CVe pressure,  
692  $P_{puve}$ , PuVe pressure,  $Q_{pua}$ , PuA flow,  $Q_{tv}$ , tricuspid valve flow,  $Q_{ao}$ , aortic valve flow,  $Q_{cve}$ , CVe flow,  $Q_{mv}$ , mitral valve flow,  $Q_{pv}$ , pulmonary valve flow,  $Q_{sr}$ , systemic vascular bed flow,  $Q_{puve}$ , PuVe  
693 flow, and  $P_{rv}$ , RV pressure.

694
